# Supplementary material
Source: HighWire-hosted journal article supplement (http://cmajopen.ca/highwire/filestream/81230/field_highwire_adjunct_files/0/2018-0074-1-at.pdf)

Appendix 1 (as supplied by the authors): Distribution of ESAS counts among ESAS users

The bars represent the number of patients with a particular number of ESAS assessment in a given year, using the y-axis to the left. The horizontal line represents the proportion of individuals who have at least 1 ESAS in that year, using the y-axis to the right.

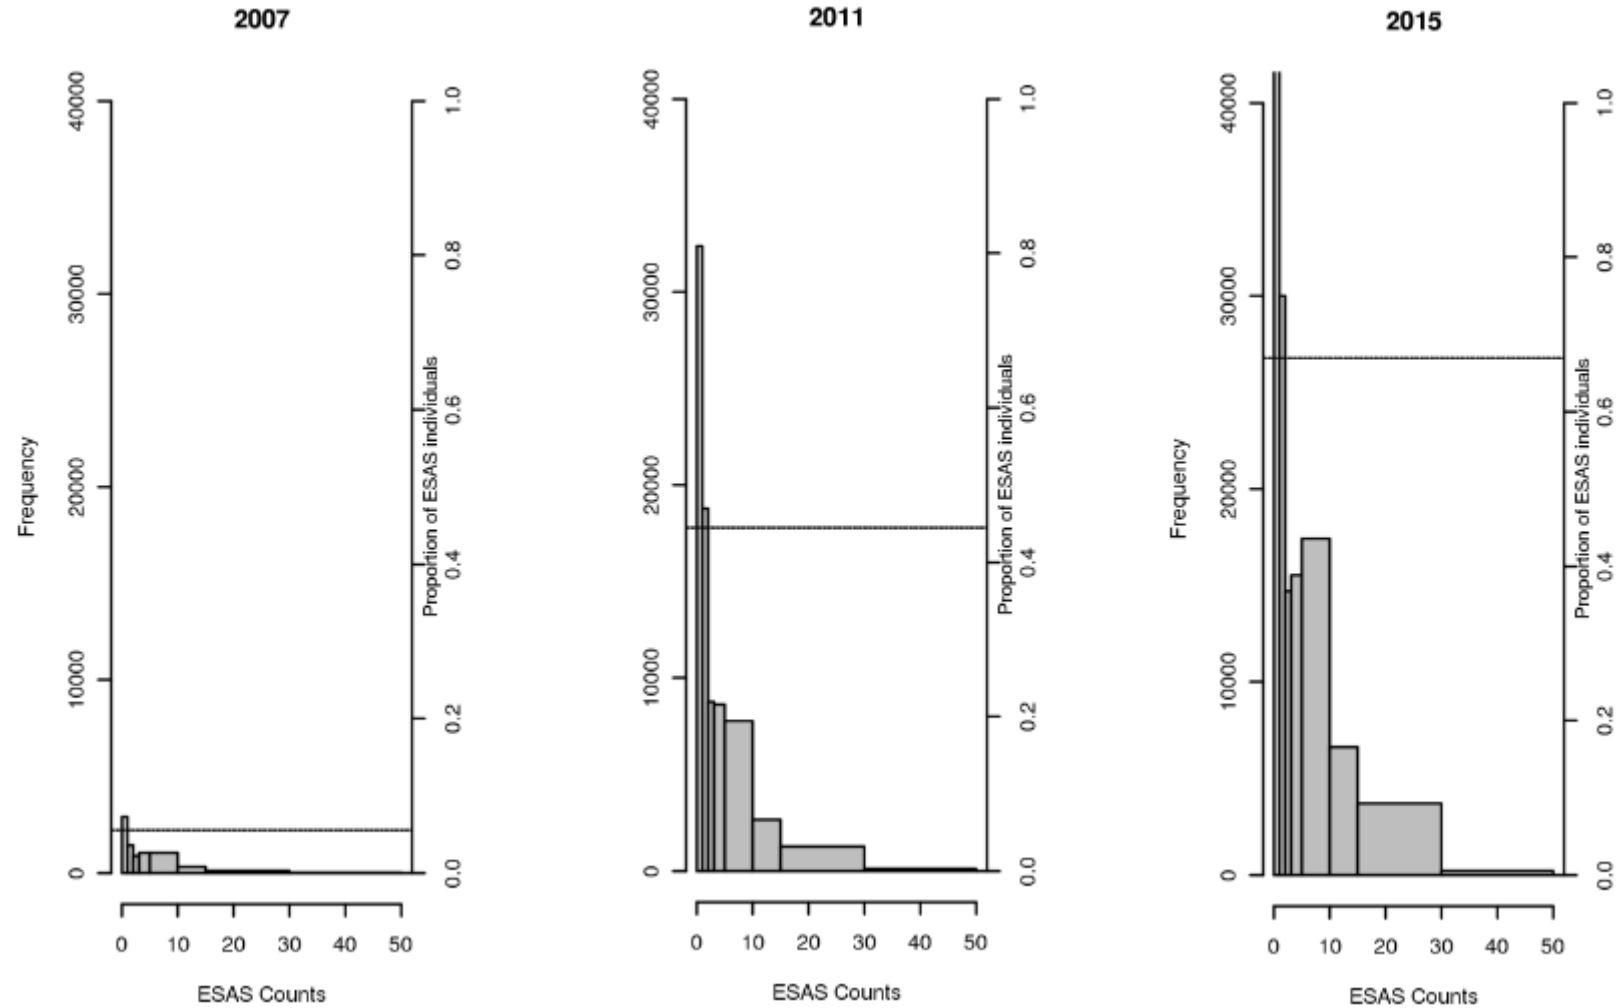

Supplement: 2018-0074-1-at.pdf [file 2018-0074-1-at.pdf]
